# Supplementary material for: Cellulose-based eco-friendly wafer-cleaning reagent
Source: Springer Nature journal article supplement (doi:10.1007/s10570-020-03026-8), 2020-02-01
Supplement: MOESM1 [file 17677854]

Electronic Supplementary Material

Cellulose-based eco-friendly wafer-cleaning reagent

Woo Young Kwon,a,# Ji-Hwan Lee,b,# Young Eun Jeon,b and Ki Soo Parka,*

a Department of Biological Engineering, College of Engineering, Konkuk University, Seoul 05029, Republic of Korea

b R&D Center, SEMES Co., Ltd., Gyeonggi 18383, Republic of Korea

*Corresponding author.

Phone/Fax: +82-2-450-3742

E-mail: akdong486@konkuk.ac.kr; kskonkuk@gmail.com


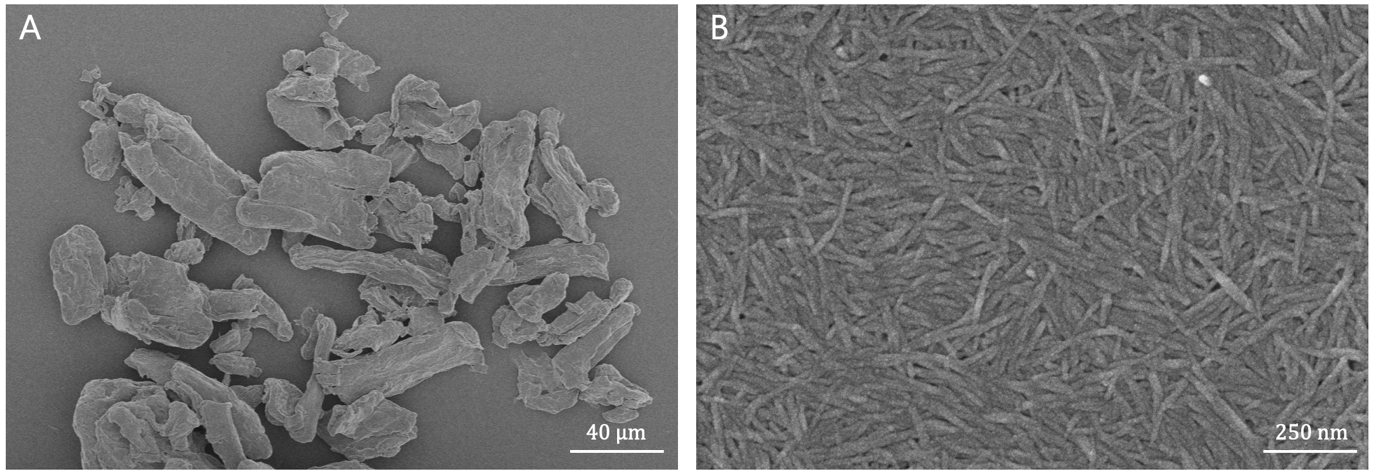


**Fig. S1** Field-emission scanning electron microscopy (FE-SEM) image of (A) microcrystalline cellulose (MCC) and (B) cellulose nanocrystals (CNCs) used in the study.


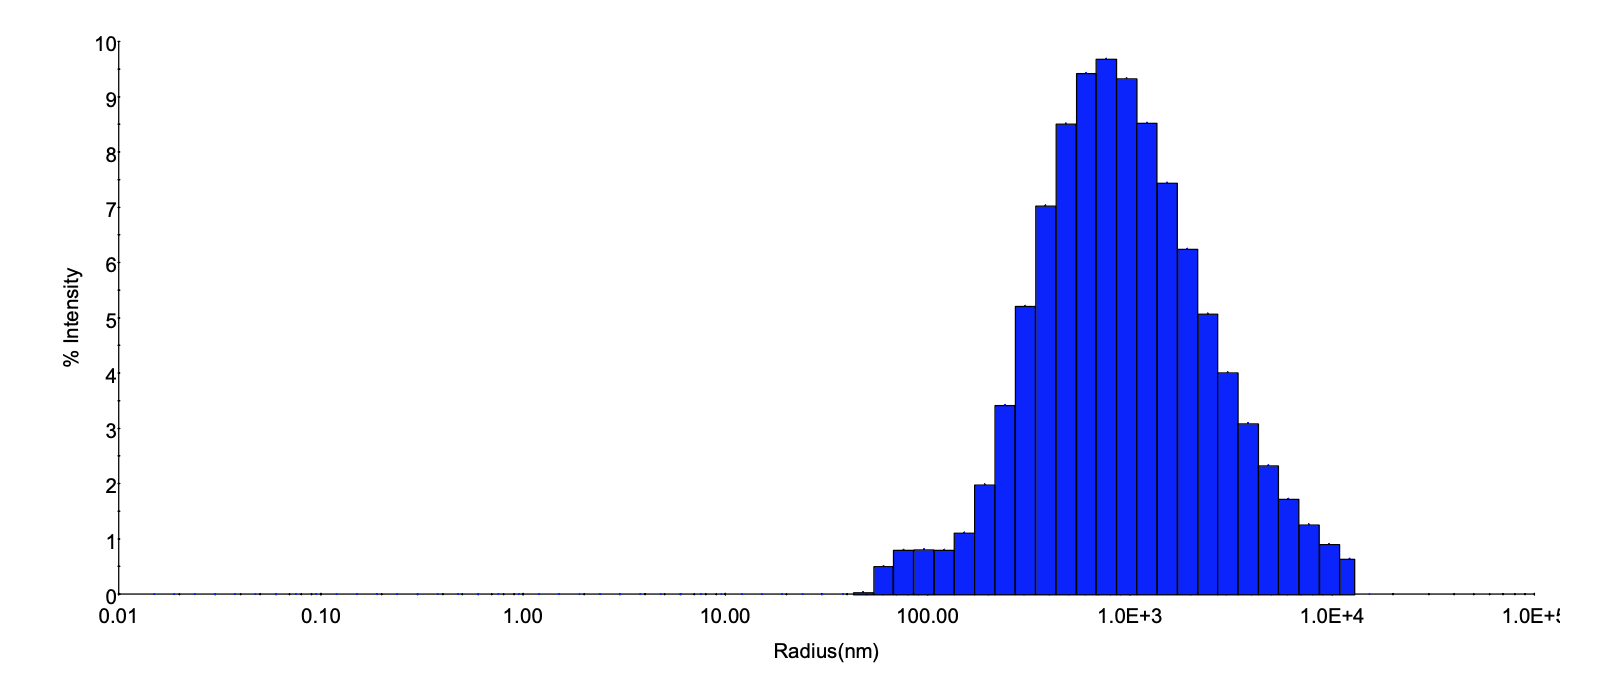


**Fig. S2** Size distribution of silica contaminants


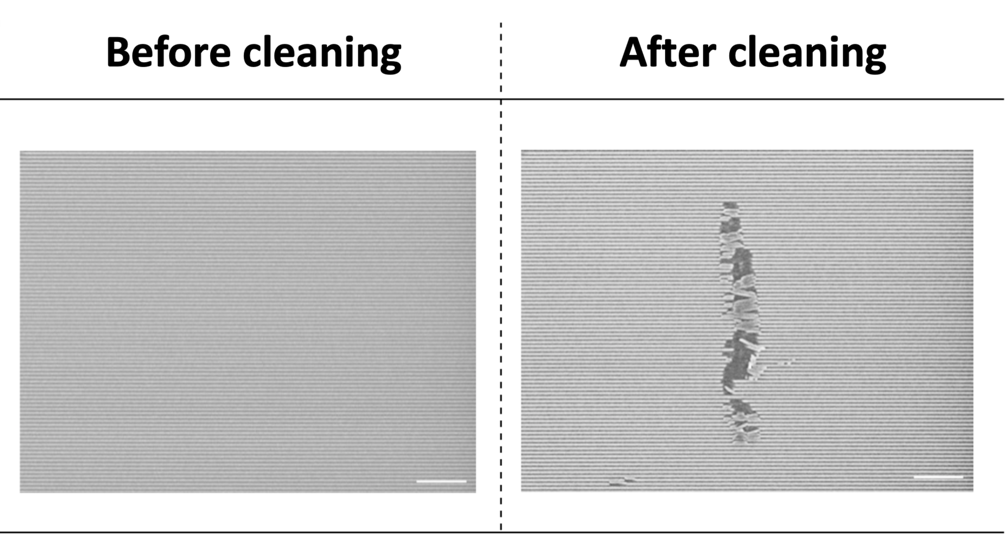


**Fig. S3** Optical microscopy images before and after cleaning with 1 wt% MCC (90 µm)-based cleaning solution (Scale bar: 2.5 µm)


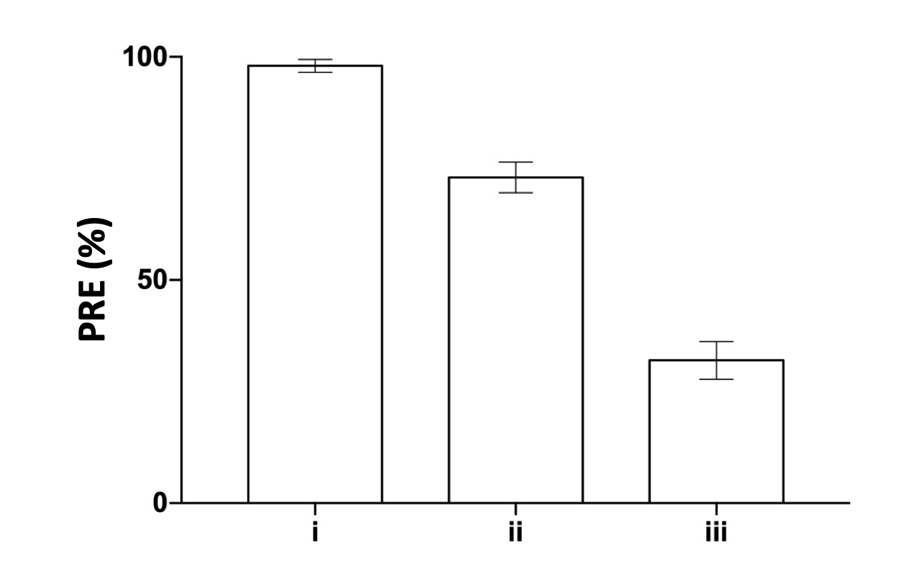


**Fig. S4** PRE of the cellulose-based cleaning solutions: (i) 1 wt% MCC (90 µm), (ii) 1 wt% MCC (20 µm), and (iii) 1 wt% CNC (150 nm)


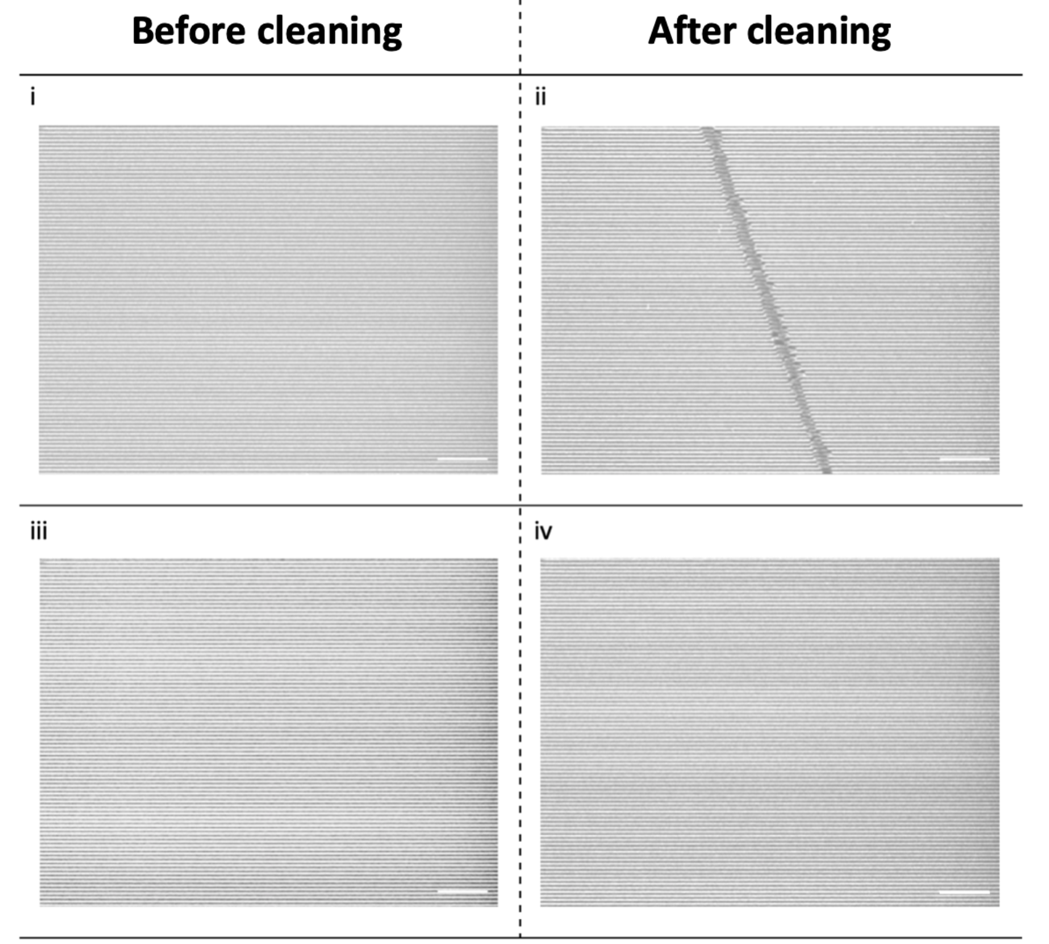


**Fig. S5** SEM images of the patterned wafer before and after cleaning using (i and ii) 1 wt% MCC (20 µm) and (iii and iv) 1 wt% CNC (150 μm) (Scale bar: 2.5 µm)


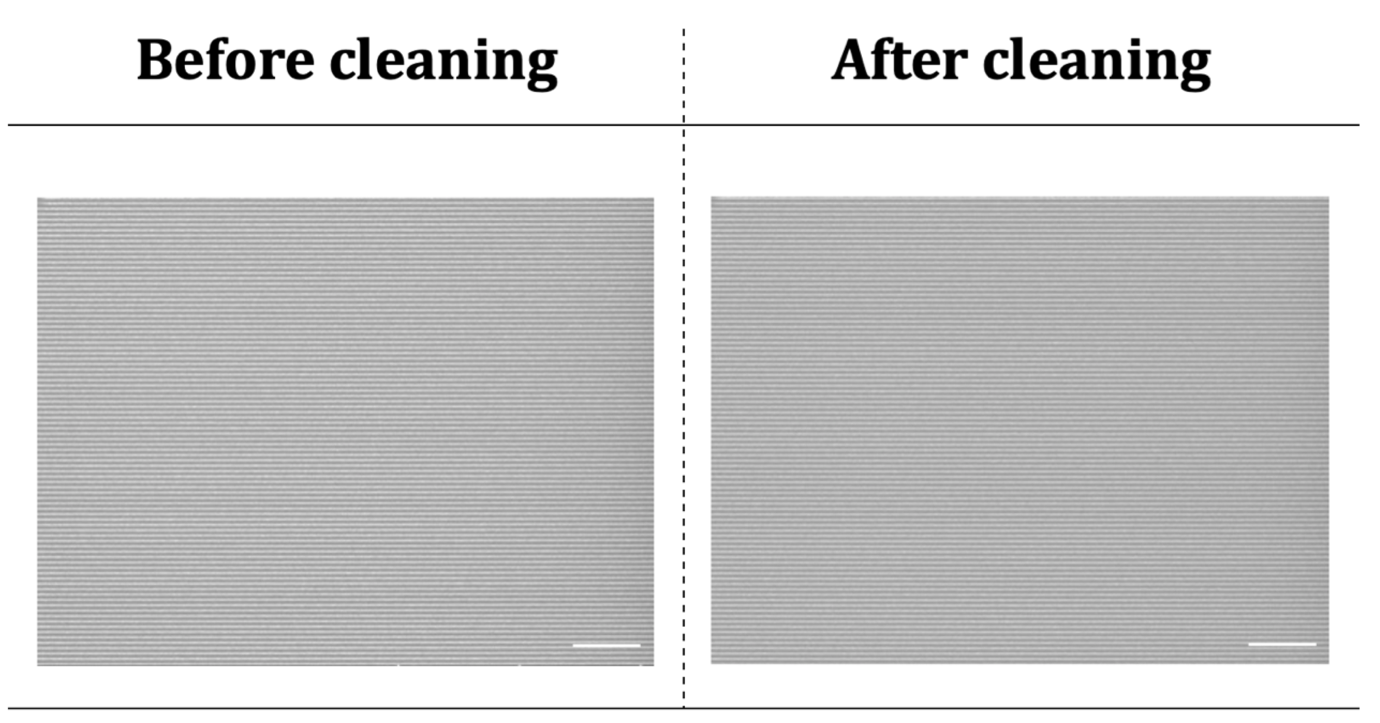


**Fig. S6** Enlarged FE-SEM images from Figure 2B (Scale bar: 2.5 µm)


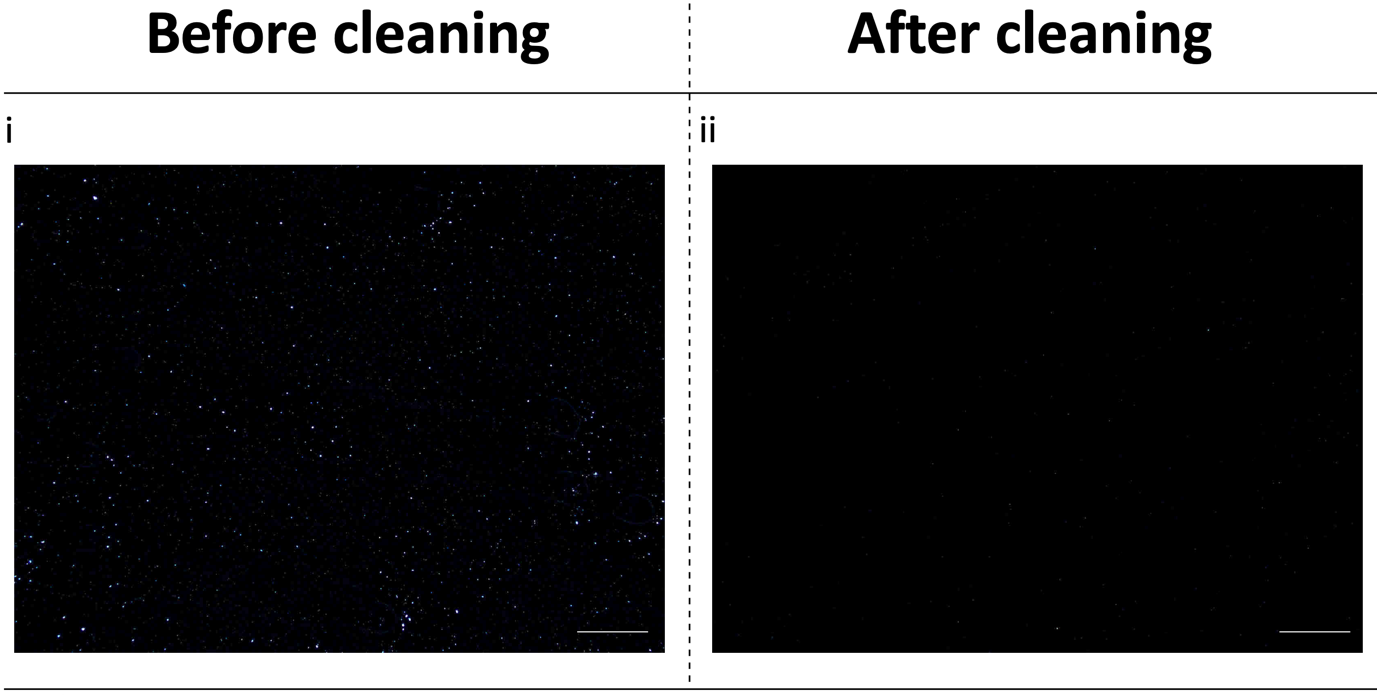


**Fig. S7** Enlarged optical microscopy images of (i) and (ii) from Figure 3B (Scale bar: 250 µm)


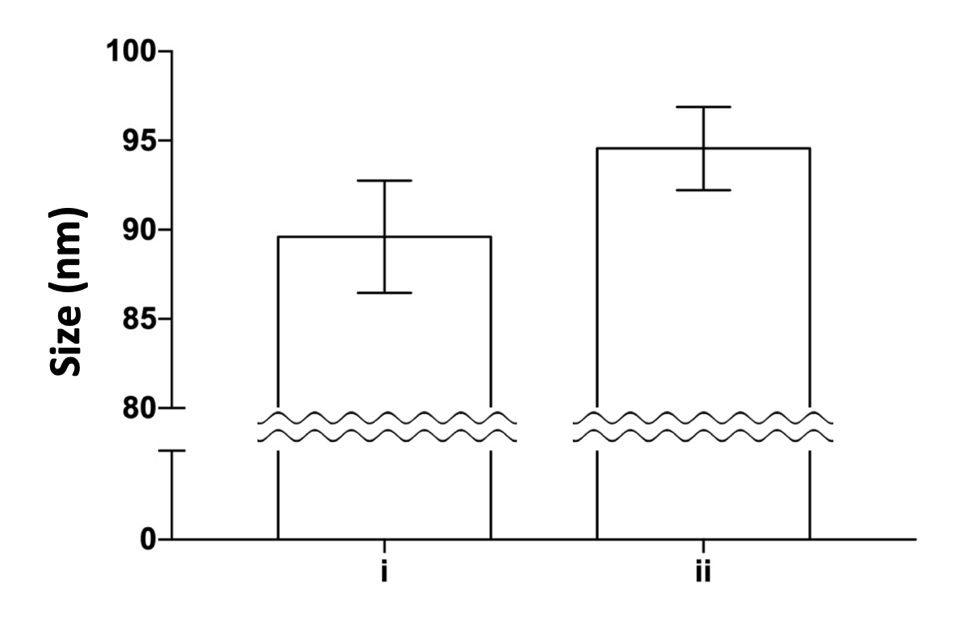


**Fig. S8** Size of 1 wt% CNC in (i) absence and (ii) presence of 5 wt% cocamidopropyl betaine (CAPB)


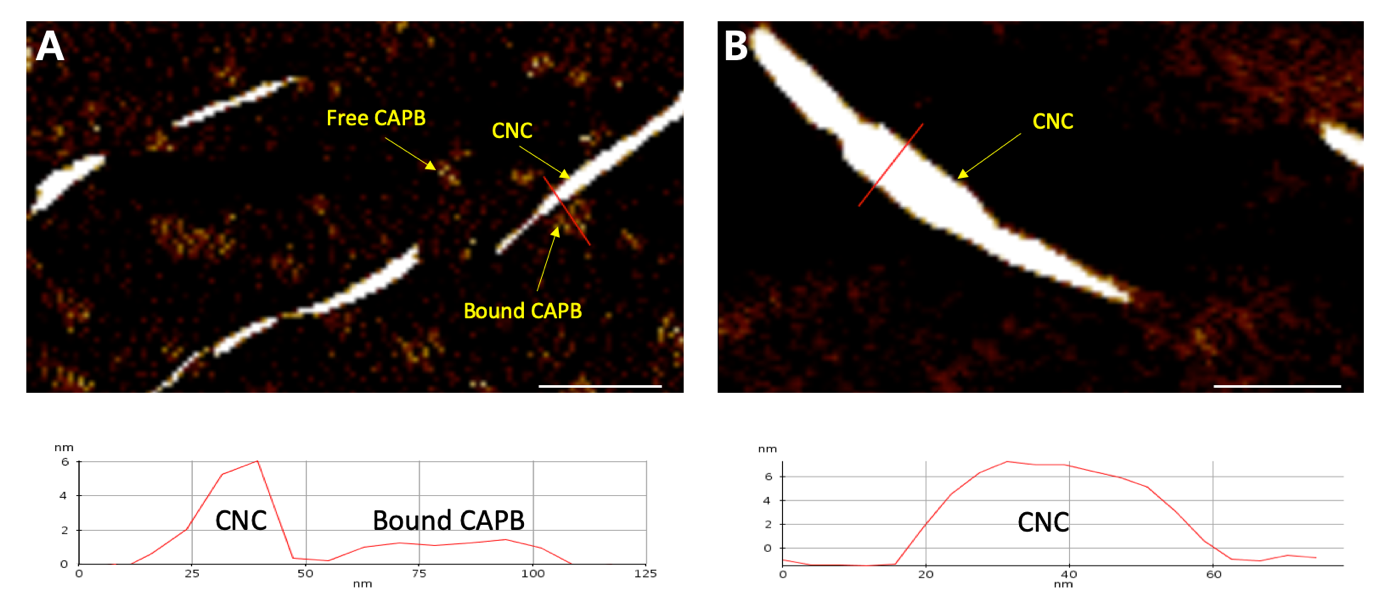


**Fig. S9** Atomic force microscopy (AFM) images (top) and height profile (taken along the red line in the AFM images; bottom) of samples containing (A) CNC + CAPB (Scale bar: 250 nm) and (B) CNC only (Scale bar: 100 nm).

**
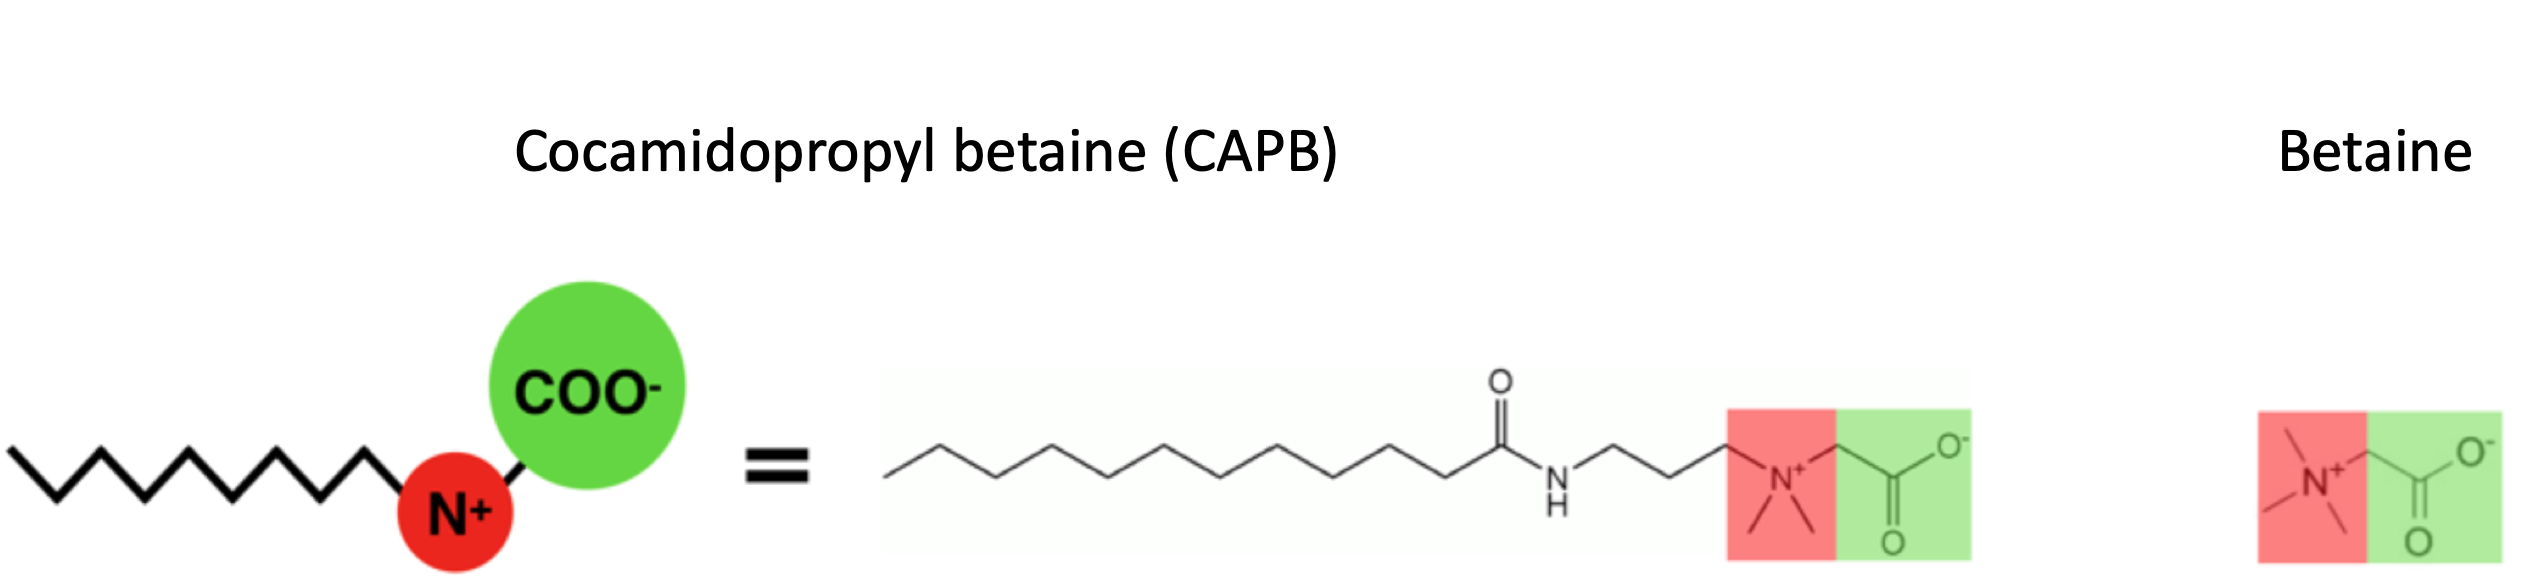
**

**Fig. S10** Chemical structures of CAPB and betaine.


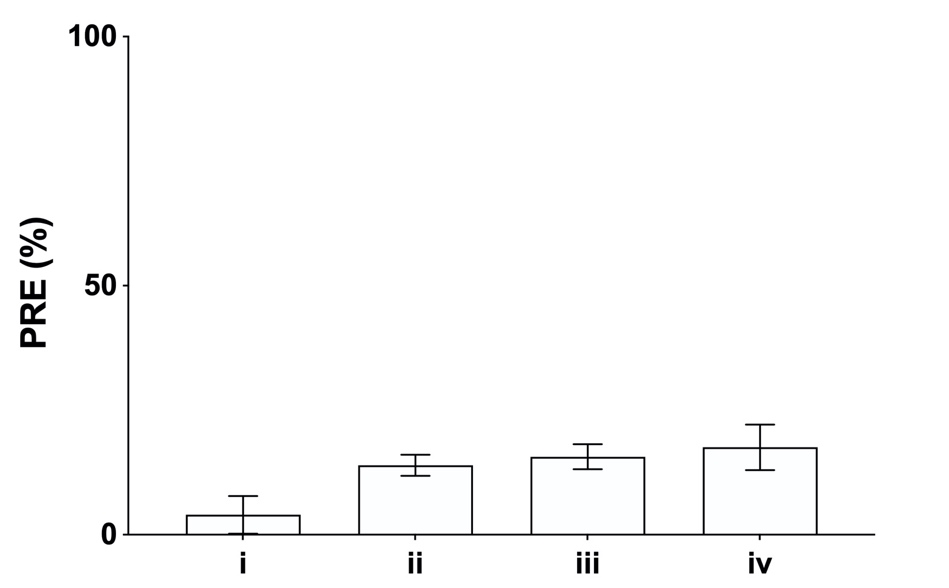


**Fig. S11** Particle removal efficiency (PRE) of the surfactants: (i) water alone, (ii) 5 wt% betaine, (iii) 5 wt% CAPB, and (iv) 5 wt% aluminum oxide (15 nm)

**Table S1** Comparison of the estimated and experimental PRE. Five different points (a–e) were selected based on the response surface design (**Figure 3A**)

| **Point** | **Concentration (%)** | | **Estimated PRE (%)** | **Actual PRE (%)** |
| --- | --- | --- | --- | --- |
| **Nanocellulose** | **CAPB** |
| a | 0.75 | 5 | 99.4 | 97.9 |
| b | 1 | 5 | 99.9 | 98.9 |
| c | 1.25 | 3 | 100 | 99.3 |
| d | 1.5 | 2 | 100 | 99.9 |
| e | 1.75 | 2 | 96.4 | 93.9 |
